# Supplementary material for: Preparation and characterization of a highly dispersed and stable Ni catalyst with a microporous nanosilica support
Source: Royal Society of Chemistry journal article supplement (doi:10.1039/c6ra15358e), 2016-01-01
Supplement: c6ra15358e1.pdf [file c6ra15358e1.pdf]

## Supporting Information

Preparation and characterization of a highly dispersed and stable Ni catalyst with microporous nanosilica as support

*Meihua Yang, Huanhuan Wu, Huayi Wu, Chuanjing Huang,\* Weizheng Weng, Mingshu Chen, Huilin Wan\**

State Key Laboratory of Physical Chemistry of Solid Surfaces, National Engineering  
Laboratory for Green Chemical Productions of Alcohols, Ethers and Esters,  
Department of Chemistry, College of Chemistry and Chemical Engineering,  
Xiamen University, Xiamen, Fujian 361005, P. R. China

*\*Corresponding Authors*

*E-mail: huangcj@xmu.edu.cn*

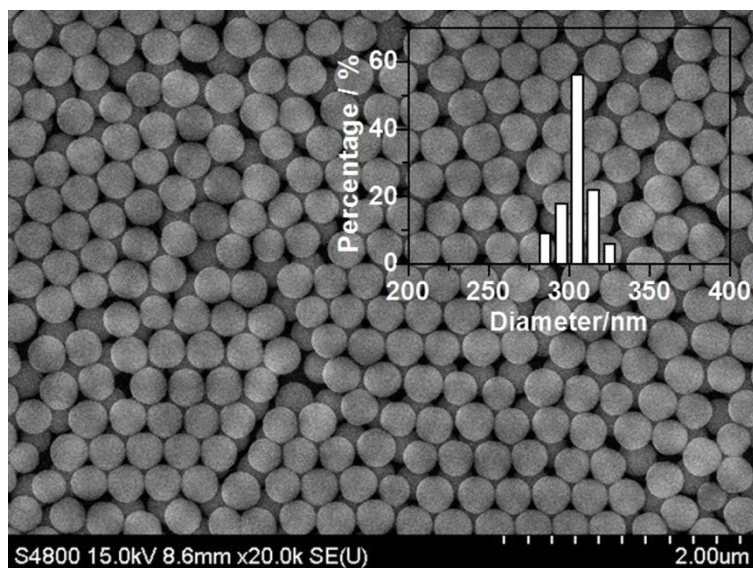

**Fig. S1.** SEM image of SiO<sub>2</sub> nanoparticles prepared by a modified Stöber method.

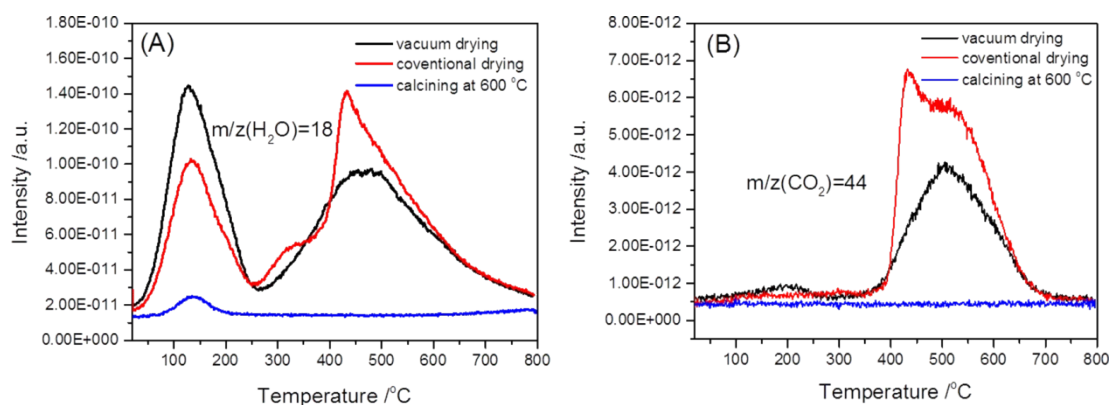

**Fig. S2.** Profiles of  $m/z = 18$  (A), and  $44$  (B) measured by mass spectrometer during thermal decomposition of different nanosilicas in O<sub>2</sub>/He mixture.

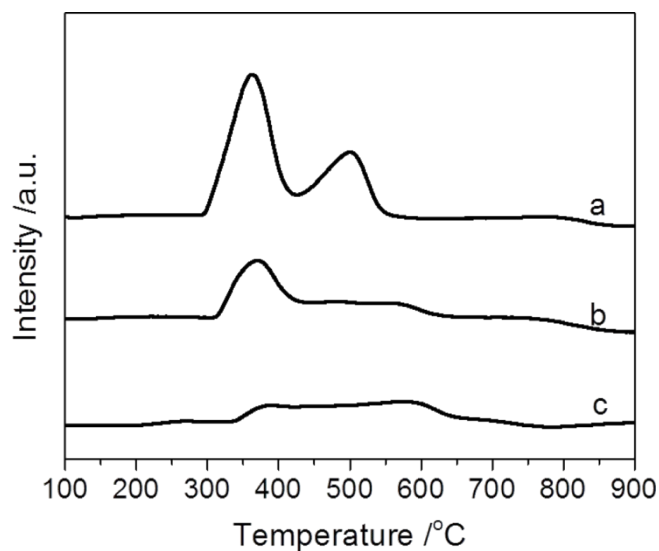

**Fig. S3.** H<sub>2</sub>-TPR profiles of different catalysts: (a) 5.0 wt% Ni/SiO<sub>2</sub>-D1; (b) 2.0 wt% Ni/SiO<sub>2</sub>-D1; (c) 1.5 wt% Ni/SiO<sub>2</sub>-D1.

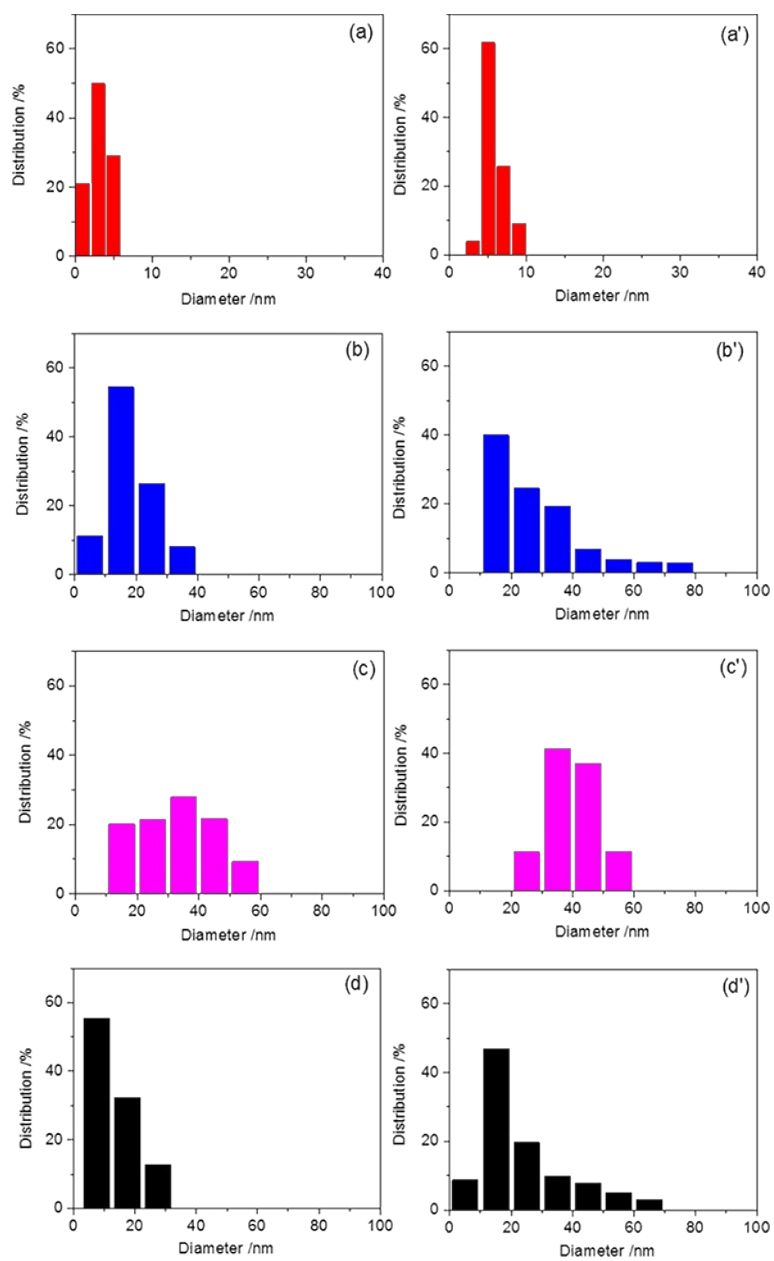

**Fig. S4.** Ni particle size distributions for Ni/SiO<sub>2</sub>-D1 catalyst before (a) and after 200 h (a') reaction, Ni/SiO<sub>2</sub>-D2 catalyst before (b) and after 60 h (b') reaction, Ni/SiO<sub>2</sub>-C catalyst before (c) and after 30 h (c') reaction, and Ni-EDTA/SiO<sub>2</sub>-D1 catalyst before (d) and after 60 h (d') reaction. Reaction conditions: T=750 °C, CH<sub>4</sub>/O<sub>2</sub>/Ar=2:1:4, GHSV=1.0×10<sup>5</sup> mL g<sup>-1</sup> h<sup>-1</sup>.

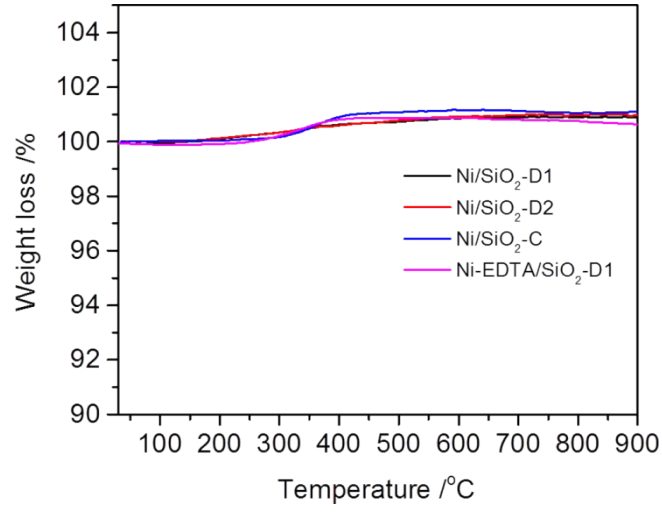

**Fig. S5.** TG profiles of different catalysts after the POM reaction.

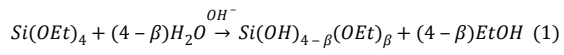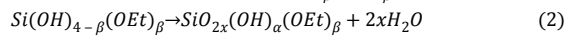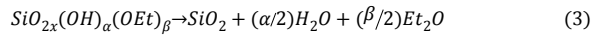

**Equations for the Stöber reaction**
